# Supplementary material
Source: PubMed Central journal article supplement (PMC7196650)
Supplement: supp_RA119.011193_156018_2_supp_500095_q7psph.pdf [file supp_RA119.011193_156018_2_supp_500095_q7psph.pdf]

## Supporting Information

**Title: It takes two (Las1 HEPN endoribonuclease domains) to cut RNA correctly**

Monica C. Pillon<sup>1,†</sup>, Kevin H. Goslen<sup>1,†,§</sup>, Jacob Gordon<sup>1</sup>, Melissa L. Wells<sup>1</sup>, Jason G. Williams<sup>2</sup>, and Robin E. Stanley<sup>1,\*</sup>

<sup>1</sup>Signal Transduction Laboratory, National Institute of Environmental Health Sciences, National Institutes of Health, Department of Health and Human Services, 111 T. W. Alexander Drive, Research Triangle Park, NC 27709, USA

<sup>2</sup>Epigenetics and Stem Cell Biology Laboratory, National Institute of Environmental Health Sciences, National Institutes of Health, Department of Health and Human Services, 111 T. W. Alexander Drive, Research Triangle Park, NC 27709, USA

Running Title: Las1 requires dual HEPN nuclease domains

†M.C.P and K.H.G contributed equally to this work and are co-first authors.

§Current address: Wake Forest School of Medicine, 475 Vine Street, Winston-Salem, NC 27101, USA

\*To whom correspondence should be addressed. Tel: 984 287 3568; Email: robin.stanley@nih.gov

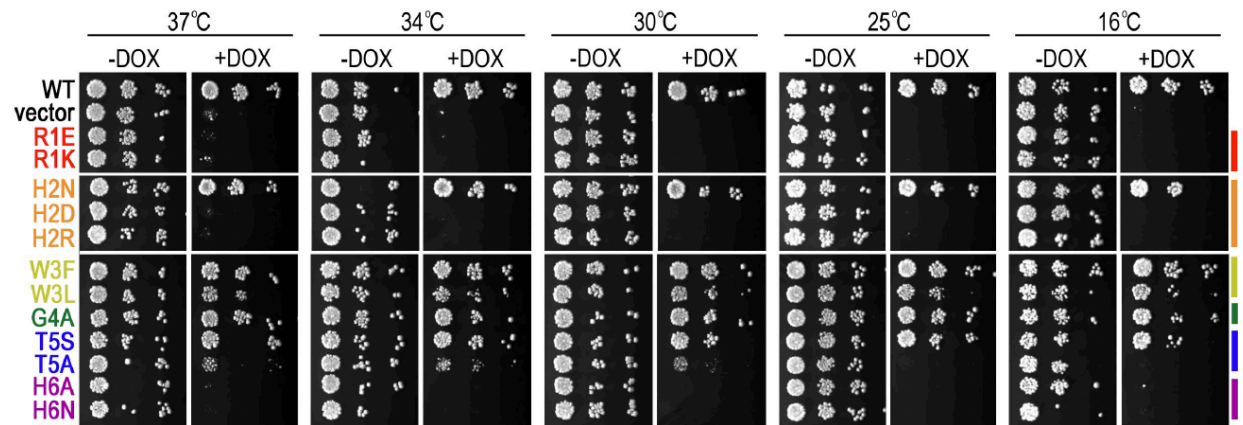

**Fig. S1.** *In vivo* assay for complementation of *S. cerevisiae* *LAS1* over a temperature range. The *S. cerevisiae* *tet-LAS1/Myc-GRC3* strain was transformed with plasmids encoding Flag-Las1 RHxhTH variants (see Table S2). Serial dilutions were spotted on YPD in the absence (-DOX) and presence (+DOX) of 40  $\mu$ g/ml doxycycline and incubated at 37°C, 34°C, 30°C, 25°C and 16°C for 2-6 days.

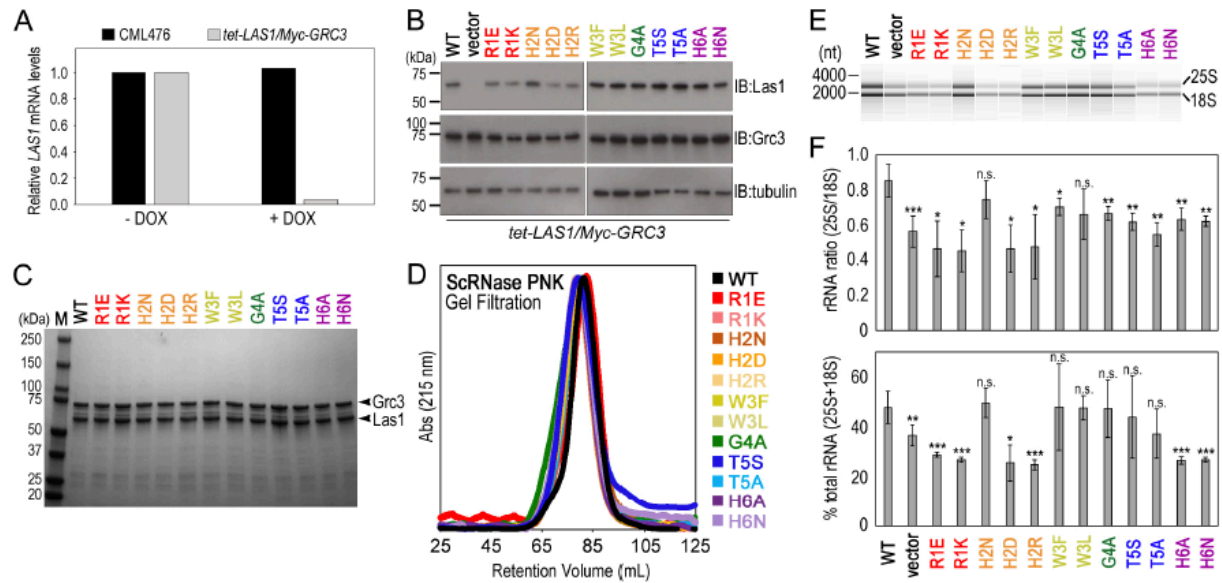

**Fig. S2.** Las1 RHxhTH variants retain their association to Grc3. (A) RT-PCR of the parent (CML476) and tet (*tet-LAS1/Myc-GRC3*) yeast strains with primers specific for *LAS1*. (B) Transformed *S. cerevisiae tet-LAS1/Myc-GRC3* strains were grown to mid-log phase at 30°C in the presence of 40 µg/ml doxycycline. Cells were lysed and equal amounts of whole cell lysate were separated by SDS-PAGE and analyzed by western blotting with anti-Flag (Las1), anti-Myc (Grc3) and anti-tubulin (loading control). IB is an abbreviation for immunoblotting. (C) SDS-PAGE analysis of purified recombinant ScRNase PNK complex comprised of full length Grc3 and Las1 RHxhTH variants. (D) Gel filtration of ScRNase PNK variants containing Las1 RHxhTH missense mutants. Wild-type RNase PNK (black) was previously shown to form a hetero-tetramer (23) and has the same retention volume as the recombinant ScRNase PNK variants. This suggests that the ScRNase PNK variants maintain higher-order assembly. (E) Extracted total RNA (250 ng) from transformed *tet-LAS1/Myc-GRC3* strains were analyzed using a bioanalyzer to monitor the levels of mature 25S and 18S rRNA. (F) Quantification of mature rRNA shown in panel E reveals a reduced ratio in mature 25S/18S rRNA (top) and total mature rRNA (25S + 18S) (bottom). The average and standard deviation were calculated from three technical replicates. n.s. not significant, \* $P < 0.05$ , \*\* $P < 0.007$ , and \*\*\* $P < 0.0007$  were calculated by two-tailed Student's *t* tests.

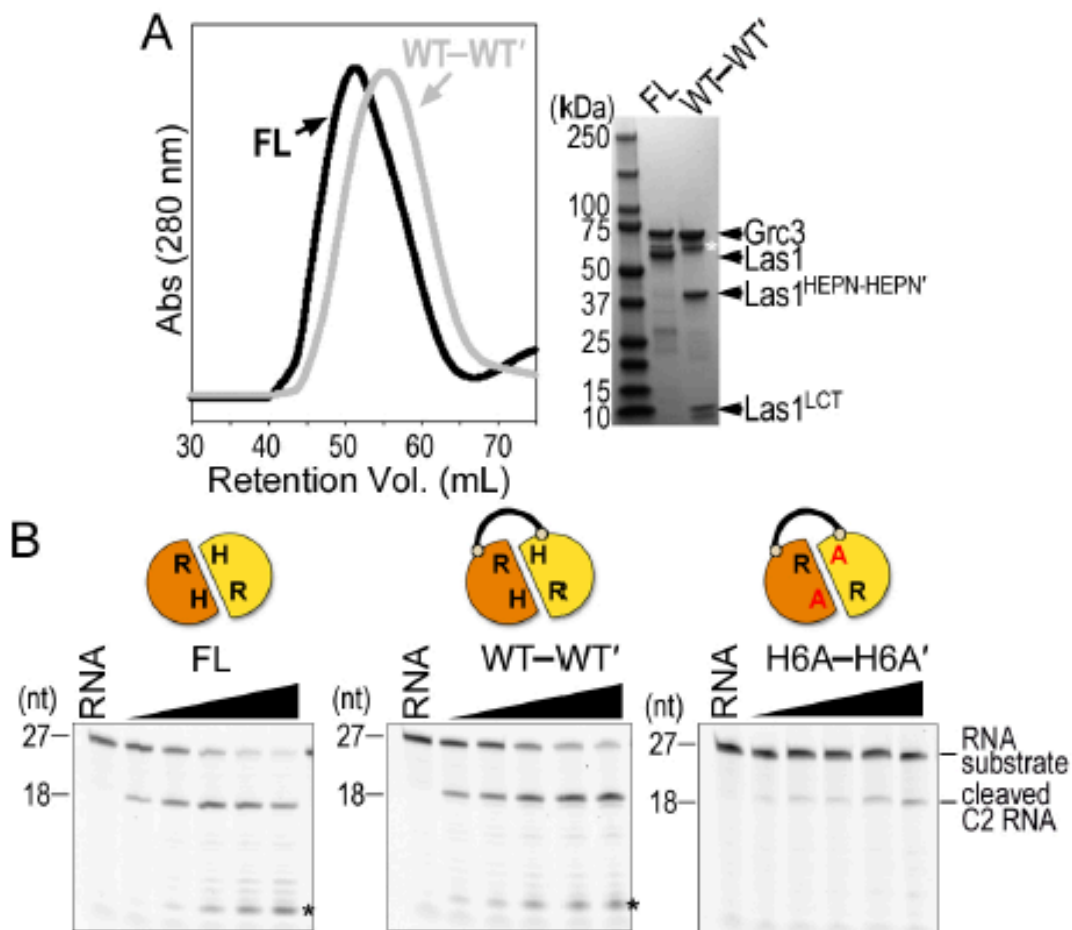

**Fig. S3.** Functional *S. cerevisiae* RNase PNK chimera for *in vitro* assays. (A) Gel filtration and SDS-PAGE analysis of full length ScRNase PNK (FL; black), composed of Las1 and Grc3, and chimeric ScRNase PNK (WT-WT'; gray), comprised of Las1 HEPN-HEPN', Las1 LCT and Grc3. White asterisk marks a Grc3 degradation product. Chimeric ScRNase PNK has a similar retention volume to the full length complex suggesting the chimera maintains its higher-order assembly despite lacking its CC domain. (B) Denaturing urea gels of reactions containing chimeric ScRNase PNK variants (0-3.2  $\mu$ M) encoding missense mutations to the Las1 RHxhTH motif. Protein variants were incubated with C2 RNA substrate (50 nM) for 1 hour at 37°C. RNA defines reactions set in the absence of protein and black asterisks marks the accumulation of a non-specific band that is dependent on the presence of active RNase PNK complex and a 3'-fluorescent label.

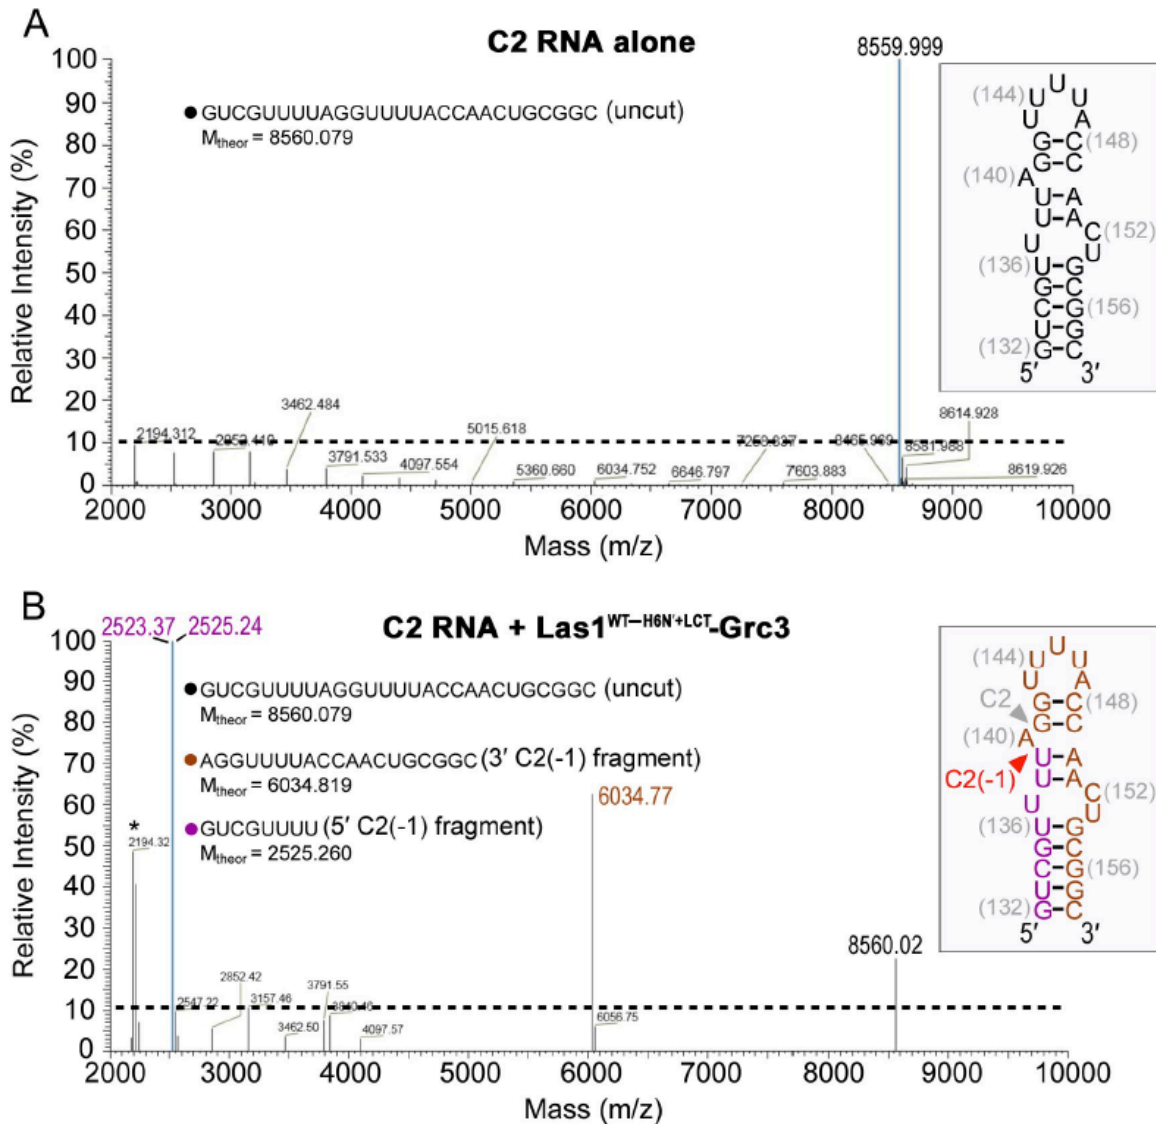

**Fig. S4.** Identification of off-target RNA products using mass spectrometry. (A-B) Spectra by LC-ESI-MS of C2 RNA substrate incubated in the (A) absence and (B) presence of chimeric RNase PNK containing Las1<sup>WT-H6N</sup>. RNA (10  $\mu$ M) was incubated in the absence and presence of protein (13  $\mu$ M) for 30 minutes at 37°C. Observed ions of  $m/z$  8560 is indicative of the uncut C2 RNA substrate. Whereas ions of  $m/z$  2525.3 and 6034.8 correspond to 5'- and 3'-RNA fragments, respectively, produced following cleavage at an off-target site (C2(-1); red arrowhead) between U139 and A140 of the *S. cerevisiae* ITS2. The 8-nucleotide 5'-fragment (magenta) harbors a 2',3'-cyclic phosphate and the 19-nucleotide 3'-fragment (brown) contains a 5'-hydroxyl end confirming the ScLas1<sup>WT-H6N</sup> variant is responsible for the off-target RNA hydrolysis.

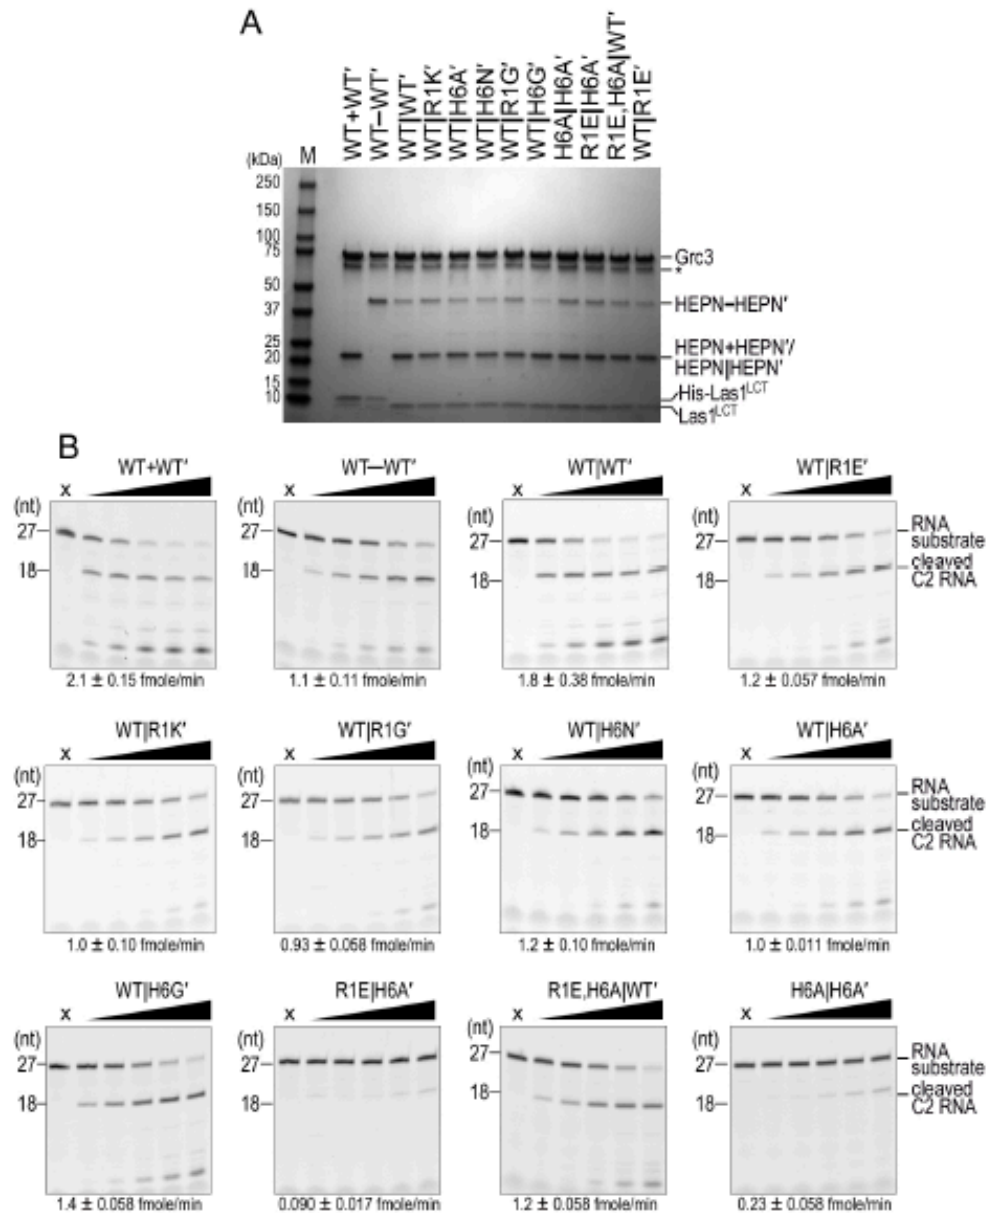

**Fig. S5.** TEV cleaved RNase PNK chimeras. (A) SDS-PAGE analysis of purified ScRNase PNK (WT+WT'), composed of Las1 (1-179 aa; 468-502 aa) and Grc3, chimeric ScRNase PNK (WT-WT'), comprised of Las1 HEPN-HEPN', Las1 LCT and Grc3, and TEV cleaved ScRNase PNK variants (WT|WT'). (B) Representative denaturing urea gels of reactions containing chimeric ScRNase PNK variants (0-3.2  $\mu$ M) encoding missense mutations to the Las1 RHxhTH motif. Protein variants were incubated with C2 RNA substrate (50 nM) for 1 hour at 37°C. The specific activity calculated from three biological replicates is shown below each gel.

**Table S1. Yeast plasmids used in this study**

| Plasmid | Variant               | <i>LAS1</i>                                      | Vector   | Source     |
|---------|-----------------------|--------------------------------------------------|----------|------------|
| pMP580  | ScLas1                | WT; residues 1-502,<br>3x N-terminal FLAG Tag    | YCplac33 | (26)       |
| pMP600  | ScLas1 <sup>R1E</sup> | R129E; residues 1-502,<br>3x N-terminal FLAG Tag | YCplac33 | This study |
| pMP648  | ScLas1 <sup>R1K</sup> | R129K; residues 1-502,<br>3x N-terminal FLAG Tag | YCplac33 | This study |
| pMP632  | ScLas1 <sup>H2N</sup> | H130N; residues 1-502,<br>3x N-terminal FLAG Tag | YCplac33 | This study |
| pMP631  | ScLas1 <sup>H2D</sup> | H130D; residues 1-502,<br>3x N-terminal FLAG Tag | YCplac33 | This study |
| pMP654  | ScLas1 <sup>H2R</sup> | H130R; residues 1-502,<br>3x N-terminal FLAG Tag | YCplac33 | This study |
| pMP601  | ScLas1 <sup>W3F</sup> | W131F; residues 1-502,<br>3x N-terminal FLAG Tag | YCplac33 | This study |
| pMP602  | ScLas1 <sup>W3L</sup> | W131L; residues 1-502,<br>3x N-terminal FLAG Tag | YCplac33 | This study |
| pMP603  | ScLas1 <sup>G4A</sup> | G132A; residues 1-502,<br>3x N-terminal FLAG Tag | YCplac33 | This study |
| pMP590  | ScLas1 <sup>T5S</sup> | T133S; residues 1-502,<br>3x N-terminal FLAG Tag | YCplac33 | This study |
| pMP656  | ScLas1 <sup>T5A</sup> | T133A; residues 1-502,<br>3x N-terminal FLAG Tag | YCplac33 | This study |
| pMP591  | ScLas1 <sup>H6A</sup> | H134A; residues 1-502,<br>3x N-terminal FLAG Tag | YCplac33 | This study |
| pMP649  | ScLas1 <sup>H6N</sup> | H134N; residues 1-502,<br>3x N-terminal FLAG Tag | YCplac33 | This study |

**Table S2. Yeast strains used and constructed in this study**

| Strain                                     | Genotype                                                                                                                                                                                                                                       | Source     |
|--------------------------------------------|------------------------------------------------------------------------------------------------------------------------------------------------------------------------------------------------------------------------------------------------|------------|
| CML476                                     | <i>MATα</i> ; <i>ura3-52</i> ; <i>leu2Δ1</i> ; <i>his3Δ200</i> ; <i>GAL2</i> ; <i>CMVp(tetR<sup>+</sup>-SSN6)::LEU2</i> ; <i>trp1::tTa</i>                                                                                                     | EUROSCARF  |
| <i>tet-LAS1</i>                            | <i>MATα</i> ; <i>ura3-52</i> ; <i>leu2Δ1</i> ; <i>his3Δ200</i> ; <i>GAL2</i> ; <i>CMVp(tetR<sup>+</sup>-SSN6)::LEU2</i> ; <i>trp1::tTa</i> ; <i>kanMX:tetO<sub>7</sub>:LAS1</i>                                                                | This Study |
| <i>tet-LAS1</i> + <i>pMP580</i>            | <i>MATα</i> ; <i>ura3-52</i> ; <i>leu2Δ1</i> ; <i>his3Δ200</i> ; <i>GAL2</i> ; <i>CMVp(tetR<sup>+</sup>-SSN6)::LEU2</i> ; <i>trp1::tTa</i> ; <i>kanMX:tetO<sub>7</sub>:LAS1</i> ; <i>pMP 580 (3xFlag-LAS1; WT)</i>                             | This Study |
| <i>tet-LAS1</i> + <i>ycplac33</i>          | <i>MATα</i> ; <i>ura3-52</i> ; <i>leu2Δ1</i> ; <i>his3Δ200</i> ; <i>GAL2</i> ; <i>CMVp(tetR<sup>+</sup>-SSN6)::LEU2</i> ; <i>trp1::tTa</i> ; <i>kanMX:tetO<sub>7</sub>:LAS1</i> ; <i>ycplac33 (empty vector)</i>                               | This Study |
| <i>tet-LAS1/Myc-GRC3</i> ( <i>yMP125</i> ) | <i>MATα</i> ; <i>ura3-52</i> ; <i>leu2Δ1</i> ; <i>his3Δ200</i> ; <i>GAL2</i> ; <i>CMVp(tetR<sup>+</sup>-SSN6)::LEU2</i> ; <i>trp1::tTa</i> ; <i>kanMX:tetO<sub>7</sub>:LAS1</i> ; <i>trp1:3xMyc:GRC3</i>                                       | (26)       |
| <i>tet-LAS1/Myc-GRC3</i> + <i>pMP580</i>   | <i>MATα</i> ; <i>ura3-52</i> ; <i>leu2Δ1</i> ; <i>his3Δ200</i> ; <i>GAL2</i> ; <i>CMVp(tetR<sup>+</sup>-SSN6)::LEU2</i> ; <i>trp1::tTa</i> ; <i>kanMX:tetO<sub>7</sub>:LAS1</i> ; <i>trp1:3xMyc:GRC3</i> ; <i>pMP 580 (3xFlag-LAS1; WT)</i>    | (26)       |
| <i>tet-LAS1/Myc-GRC3</i> + <i>ycplac33</i> | <i>MATα</i> ; <i>ura3-52</i> ; <i>leu2Δ1</i> ; <i>his3Δ200</i> ; <i>GAL2</i> ; <i>CMVp(tetR<sup>+</sup>-SSN6)::LEU2</i> ; <i>trp1::tTa</i> ; <i>kanMX:tetO<sub>7</sub>:LAS1</i> ; <i>trp1:3xMyc:GRC3</i> ; <i>ycplac33 (empty vector)</i>      | (26)       |
| <i>tet-LAS1/Myc-GRC3</i> + <i>pMP600</i>   | <i>MATα</i> ; <i>ura3-52</i> ; <i>leu2Δ1</i> ; <i>his3Δ200</i> ; <i>GAL2</i> ; <i>CMVp(tetR<sup>+</sup>-SSN6)::LEU2</i> ; <i>trp1::tTa</i> ; <i>kanMX:tetO<sub>7</sub>:LAS1</i> ; <i>trp1:3xMyc:GRC3</i> ; <i>pMP 600 (3xFlag-LAS1; R129E)</i> | This Study |
| <i>tet-LAS1/Myc-GRC3</i> + <i>pMP648</i>   | <i>MATα</i> ; <i>ura3-52</i> ; <i>leu2Δ1</i> ; <i>his3Δ200</i> ; <i>GAL2</i> ; <i>CMVp(tetR<sup>+</sup>-SSN6)::LEU2</i> ; <i>trp1::tTa</i> ; <i>kanMX:tetO<sub>7</sub>:LAS1</i> ; <i>trp1:3xMyc:GRC3</i> ; <i>pMP 648 (3xFlag-LAS1; R129K)</i> | This Study |
| <i>tet-LAS1/Myc-GRC3</i> + <i>pMP632</i>   | <i>MATα</i> ; <i>ura3-52</i> ; <i>leu2Δ1</i> ; <i>his3Δ200</i> ; <i>GAL2</i> ; <i>CMVp(tetR<sup>+</sup>-SSN6)::LEU2</i> ; <i>trp1::tTa</i> ; <i>kanMX:tetO<sub>7</sub>:LAS1</i> ; <i>trp1:3xMyc:GRC3</i> ; <i>pMP 632 (3xFlag-LAS1; H130N)</i> | This Study |
| <i>tet-LAS1/Myc-GRC3</i> + <i>pMP631</i>   | <i>MATα</i> ; <i>ura3-52</i> ; <i>leu2Δ1</i> ; <i>his3Δ200</i> ; <i>GAL2</i> ; <i>CMVp(tetR<sup>+</sup>-SSN6)::LEU2</i> ; <i>trp1::tTa</i> ; <i>kanMX:tetO<sub>7</sub>:LAS1</i> ; <i>trp1:3xMyc:GRC3</i> ; <i>pMP 631 (3xFlag-LAS1; H130D)</i> | This Study |
| <i>tet-LAS1/Myc-GRC3</i> + <i>pMP654</i>   | <i>MATα</i> ; <i>ura3-52</i> ; <i>leu2Δ1</i> ; <i>his3Δ200</i> ; <i>GAL2</i> ; <i>CMVp(tetR<sup>+</sup>-SSN6)::LEU2</i> ; <i>trp1::tTa</i> ; <i>kanMX:tetO<sub>7</sub>:LAS1</i> ; <i>trp1:3xMyc:GRC3</i> ; <i>pMP 654 (3xFlag-LAS1; H130R)</i> | This Study |
| <i>tet-LAS1/Myc-GRC3</i> + <i>pMP601</i>   | <i>MATα</i> ; <i>ura3-52</i> ; <i>leu2Δ1</i> ; <i>his3Δ200</i> ; <i>GAL2</i> ; <i>CMVp(tetR<sup>+</sup>-SSN6)::LEU2</i> ; <i>trp1::tTa</i> ; <i>kanMX:tetO<sub>7</sub>:LAS1</i> ; <i>trp1:3xMyc:GRC3</i> ; <i>pMP 601 (3xFlag-LAS1; W131F)</i> | This Study |
| <i>tet-LAS1/Myc-GRC3</i> + <i>pMP602</i>   | <i>MATα</i> ; <i>ura3-52</i> ; <i>leu2Δ1</i> ; <i>his3Δ200</i> ; <i>GAL2</i> ; <i>CMVp(tetR<sup>+</sup>-SSN6)::LEU2</i> ; <i>trp1::tTa</i> ; <i>kanMX:tetO<sub>7</sub>:LAS1</i> ; <i>trp1:3xMyc:GRC3</i> ; <i>pMP 602 (3xFlag-LAS1; W131L)</i> | This Study |
| <i>tet-LAS1/Myc-GRC3</i> + <i>pMP603</i>   | <i>MATα</i> ; <i>ura3-52</i> ; <i>leu2Δ1</i> ; <i>his3Δ200</i> ; <i>GAL2</i> ; <i>CMVp(tetR<sup>+</sup>-SSN6)::LEU2</i> ; <i>trp1::tTa</i> ; <i>kanMX:tetO<sub>7</sub>:LAS1</i> ; <i>trp1:3xMyc:GRC3</i> ; <i>pMP 603 (3xFlag-LAS1; G132A)</i> | This Study |



|                                             |                                                                                                                                                                                                                                                 |            |
|---------------------------------------------|-------------------------------------------------------------------------------------------------------------------------------------------------------------------------------------------------------------------------------------------------|------------|
| <i>tet-LAS1/Myc-GRC3</i><br>+ <i>pMP590</i> | <i>MATα</i> ; <i>ura3-52</i> ; <i>leu2Δ1</i> ; <i>his3Δ200</i> ; <i>GAL2</i> ; <i>CMVp(tetR<sup>'</sup>-SSN6)::LEU2</i> ; <i>trp1::tTa</i> ; <i>kanMX:tetO<sub>7</sub>: LAS1</i> ; <i>trp1:3xMyc:GRC3</i> ; <i>pMP 590 (3xFlag-LAS1; T133S)</i> | This Study |
| <i>tet-LAS1/Myc-GRC3</i><br>+ <i>pMP656</i> | <i>MATα</i> ; <i>ura3-52</i> ; <i>leu2Δ1</i> ; <i>his3Δ200</i> ; <i>GAL2</i> ; <i>CMVp(tetR<sup>'</sup>-SSN6)::LEU2</i> ; <i>trp1::tTa</i> ; <i>kanMX:tetO<sub>7</sub>: LAS1</i> ; <i>trp1:3xMyc:GRC3</i> ; <i>pMP 656 (3xFlag-LAS1; T133A)</i> | This Study |
| <i>tet-LAS1/Myc-GRC3</i><br>+ <i>pMP591</i> | <i>MATα</i> ; <i>ura3-52</i> ; <i>leu2Δ1</i> ; <i>his3Δ200</i> ; <i>GAL2</i> ; <i>CMVp(tetR<sup>'</sup>-SSN6)::LEU2</i> ; <i>trp1::tTa</i> ; <i>kanMX:tetO<sub>7</sub>: LAS1</i> ; <i>trp1:3xMyc:GRC3</i> ; <i>pMP 591 (3xFlag-LAS1; H134A)</i> | This Study |
| <i>tet-LAS1/Myc-GRC3</i><br>+ <i>pMP649</i> | <i>MATα</i> ; <i>ura3-52</i> ; <i>leu2Δ1</i> ; <i>his3Δ200</i> ; <i>GAL2</i> ; <i>CMVp(tetR<sup>'</sup>-SSN6)::LEU2</i> ; <i>trp1::tTa</i> ; <i>kanMX:tetO<sub>7</sub>: LAS1</i> ; <i>trp1:3xMyc:GRC3</i> ; <i>pMP 649 (3xFlag-LAS1; H134N)</i> | This Study |

**Table S3. *E. coli* expression plasmids used and constructed in this study**

| Plasmid | Variant                                 | <i>GRC3</i> | <i>LAS1</i>                                                                       | Vector | Source     |
|---------|-----------------------------------------|-------------|-----------------------------------------------------------------------------------|--------|------------|
| pMP001  | ScLas1-Grc3                             | 1-632 aa    | 1-502 aa                                                                          | pST39  | (23)       |
| pMP538  | ScLas1 <sup>R1E</sup> -Grc3             | 1-632 aa    | 1-502 aa; R129E                                                                   | pST39  | This Study |
| pMP593  | ScLas1 <sup>R1K</sup> -Grc3             | 1-632 aa    | 1-502 aa; R129K                                                                   | pST39  | This Study |
| pMP531  | ScLas1 <sup>H2N</sup> -Grc3             | 1-632 aa    | 1-502 aa; H130N                                                                   | pST39  | This Study |
| pMP530  | ScLas1 <sup>H2R</sup> -Grc3             | 1-632 aa    | 1-502 aa; H130R                                                                   | pST39  | This Study |
| pMP594  | ScLas1 <sup>H2D</sup> -Grc3             | 1-632 aa    | 1-502 aa; H130D                                                                   | pST39  | This Study |
| pMP629  | ScLas1 <sup>W3F</sup> -Grc3             | 1-632 aa    | 1-502 aa; W131F                                                                   | pST39  | This Study |
| pMP628  | ScLas1 <sup>W3L</sup> -Grc3             | 1-632 aa    | 1-502 aa; W131L                                                                   | pST39  | This Study |
| pMP541  | ScLas1 <sup>G4A</sup> -Grc3             | 1-632 aa    | 1-502 aa; G132A                                                                   | pST39  | This Study |
| pMP517  | ScLas1 <sup>T5S</sup> -Grc3             | 1-632 aa    | 1-502 aa; T133S                                                                   | pST39  | This Study |
| pMP595  | ScLas1 <sup>T5A</sup> -Grc3             | 1-632 aa    | 1-502 aa; T133A                                                                   | pST39  | This Study |
| pMP539  | ScLas1 <sup>H6A</sup> -Grc3             | 1-632 aa    | 1-502 aa; H134A                                                                   | pST39  | This Study |
| pMP592  | ScLas1 <sup>H6N</sup> -Grc3             | 1-632 aa    | 1-502 aa; H134N                                                                   | pST39  | This Study |
| pMP673  | ScLas1 <sup>WT-WT'+LCT</sup> -Grc3      | 1-632 aa    | HEPN-HEPN': 1-179 aa, 2x GGGGS linker, 1-185 aa + LCT: 469-502 aa                 | pST39  | This Study |
| pMP681  | ScLas1 <sup>WT-H6A'+LCT</sup> -Grc3     | 1-632 aa    | HEPN-HEPN': 1-179 aa, 2x GGGGS linker, 1-185 aa (H134A) + LCT: 469-502 aa         | pST39  | This Study |
| pMP682  | ScLas1 <sup>WT-H6N'+LCT</sup> -Grc3     | 1-632 aa    | HEPN-HEPN': 1-179 aa, 2x GGGGS linker, 1-185 aa (H134N) + LCT: 469-502 aa         | pST39  | This Study |
| pMP683  | ScLas1 <sup>WT-R1E'+LCT</sup> -Grc3     | 1-632 aa    | HEPN-HEPN': 1-179 aa, 2x GGGGS linker, 1-185 aa (R129E) + LCT: 469-502 aa         | pST39  | This Study |
| pMP684  | ScLas1 <sup>WT-R1K'+LCT</sup> -Grc3     | 1-632 aa    | HEPN-HEPN': 1-179 aa, 2x GGGGS linker, 1-185 aa (R129K) + LCT: 469-502 aa         | pST39  | This Study |
| pMP691  | ScLas1 <sup>R1E-H6A'+LCT</sup> -Grc3    | 1-632 aa    | HEPN-HEPN': 1-179 aa (R129E), 2x GGGGS linker, 1-185 aa (H134A) + LCT: 469-502 aa | pST39  | This Study |
| pMP697  | ScLas1 <sup>R1E,H6A-WT'+LCT</sup> -Grc3 | 1-632 aa    | HEPN-HEPN': 1-179 aa (R129E, H134A), 2x GGGGS                                     | pST39  | This Study |

|        |                                       |          |                                                                                   |       |            |
|--------|---------------------------------------|----------|-----------------------------------------------------------------------------------|-------|------------|
|        |                                       |          | linker, 1-185 aa + LCT: 469-502 aa                                                |       |            |
| pMP695 | ScLas1 <sup>H6A-H64A'+LCT</sup> -Grc3 | 1-632 aa | HEPN-HEPN': 1-179 aa (H134A), 2x GGGGS linker, 1-185 aa (H134A) + LCT: 469-502 aa | pST39 | This Study |
| pMP301 | ScLas1-Grc3                           | 1-632 aa | 1-179 aa; 469-502 aa                                                              | pST39 | (23)       |
| pMP773 | ScLas1 <sup>WT-WT'+LCT</sup> -Grc3    | 1-632 aa | HEPN-HEPN': 1-179 aa, GGGGS-TEV-GGGS linker, 1-185 aa + LCT: 469-502 aa           | pST39 | This Study |
| pMP774 | ScLas1 <sup>WT-R1K'+LCT</sup> -Grc3   | 1-632 aa | HEPN-HEPN(R1K)': 1-179 aa, GGGGS-TEV-GGGS linker, 1-185 aa + LCT: 469-502 aa      | pST39 | This Study |
| pMP775 | ScLas1 <sup>WT-H6A'+LCT</sup> -Grc3   | 1-632 aa | HEPN-HEPN(H6A)': 1-179 aa, GGGGS-TEV-GGGS linker, 1-185 aa + LCT: 469-502 aa      | pST39 | This Study |
| pMP776 | ScLas1 <sup>WT-H6N'+LCT</sup> -Grc3   | 1-632 aa | HEPN-HEPN(H6N)': 1-179 aa, GGGGS-TEV-GGGS linker, 1-185 aa + LCT: 469-502 aa      | pST39 | This Study |
| pMP777 | ScLas1 <sup>WT-R1G'+LCT</sup> -Grc3   | 1-632 aa | HEPN-HEPN(R1G)': 1-179 aa, GGGGS-TEV-GGGS linker, 1-185 aa + LCT: 469-502 aa      | pST39 | This Study |
| pMP778 | ScLas1 <sup>WT-H6G'+LCT</sup> -Grc3   | 1-632 aa | HEPN-HEPN(H6G)': 1-179 aa, GGGGS-TEV-GGGS linker, 1-185 aa + LCT: 469-502 aa      | pST39 | This Study |
| pMP779 | ScLas1 <sup>H6A-H6A'+LCT</sup> -Grc3  | 1-632 aa | HEPN(H6A)-HEPN(H6A)': 1-179 aa, GGGGS-TEV-GGGS linker, 1-185 aa + LCT: 469-502 aa | pST39 | This Study |
| pMP780 | ScLas1 <sup>R1E-H6A'+LCT</sup> -Grc3  | 1-632 aa | HEPN(R1E)-HEPN(H6A)': 1-179 aa, GGGGS-TEV-GGGS linker, 1-185 aa + LCT: 469-502 aa | pST39 | This Study |
| pMP781 | ScLas1 <sup>R1E-H6A'+LCT</sup> -Grc3  | 1-632 aa | HEPN(R1E H6A)-HEPN': 1-179 aa, GGGGS-TEV-GGGS linker, 1-185 aa + LCT: 469-502 aa  | pST39 | This Study |
| pMP782 | ScLas1 <sup>R1E-WT'+LCT</sup> -Grc3   | 1-632 aa | HEPN(R1E)-HEPN': 1-179 aa, GGGGS-TEV-GGGS linker, 1-185 aa + LCT: 469-502 aa      | pST39 | This Study |

**Table S4. RT-PCR Primers**

| Primer      | Sequence                               |
|-------------|----------------------------------------|
| Las1RT1Fwd  | 5' TGG AAGCGACTTAGAAACGAG 3'           |
| Las1RTT1Rev | 5' CTTGCGTGTGAACTTTTCCTC 3'            |
| Tfc1RTFwd   | 5' GCTGGCACTCATATCTTATCGTTTCACAATGG 3' |
| Tfc1RTRev   | 5' GAACCTGCTGTCAATACCGCCTGGAG 3'       |
